# Supplementary material for: Metal Complexation for the Rational Design of Gemcitabine Formulations in Cancer Therapy
Source: PubMed Central journal article supplement (PMC11503523; doi:10.1021/acsami.4c12550), 2024-10-08
Supplement: am4c12550_si_001.pdf [file am4c12550_si_001.pdf]

## Supporting Information

### Metal complexation for the rational design of gemcitabine formulations in cancer therapy

Federica Carnamucio<sup>1\*</sup>, Claudia Foti<sup>2</sup>, Massimiliano Cordaro<sup>2</sup>, Franz Saija<sup>3</sup>, Giuseppe Cassone<sup>3\*</sup>, Sandro R. P. da Rocha<sup>1</sup>, Ottavia Giuffrè<sup>2\*</sup>

<sup>1</sup>Department of Pharmaceutics and Center for Pharmaceutical Engineering and Sciences - School of Pharmacy, Virginia Commonwealth University, Richmond, VA 23284, United State

<sup>2</sup>Dipartimento di Scienze Chimiche, Biologiche, Farmaceutiche ed Ambientali, Università di Messina, Viale F. Stagno d'Alcontres 31, 98166 Messina, Italy

<sup>3</sup>Institute for Chemical-Physical Processes National Research Council of Italy, Viale Ferdinando Stagno d'Alcontres, 37, 98158 Messina, Italy

\*corresponding: FC ([carnamuciof@vcu.edu](mailto:carnamuciof@vcu.edu)); GC ([giuseppe.cassone@ipcf.cnr.it](mailto:giuseppe.cassone@ipcf.cnr.it)); OG ([ogiuffre@unime.it](mailto:ogiuffre@unime.it))

**Table S1.** Hydrolysis constants of Ca<sup>2+</sup> at different temperatures and ionic strength values.

| Species                                                                    | <i>t</i> / °C | <i>I</i> / mol L <sup>-1</sup> | logβ <sup>1</sup>     |
|----------------------------------------------------------------------------|---------------|--------------------------------|-----------------------|
| Ca <sup>2+</sup> + H <sub>2</sub> O ⇌ [CaOH] <sup>+</sup> + H <sup>+</sup> | 15            | 0.15                           | -13.14                |
|                                                                            | 25            | 0.15                           | -12.87                |
|                                                                            | 25            | 0.5                            | -12.88                |
|                                                                            | 25            | 1                              | -12.81                |
|                                                                            | 37            | 0.15                           | -12.56                |
|                                                                            | 45            | 0.15                           | -12.6(5) <sup>2</sup> |

<sup>1</sup> Crea, F.; De Stefano, C., Milea, D., Pettignano, A., Sammartano, S. (2015). SALMO and S3M: A Saliva Model and a Single Saliva Salt Model for Equilibrium Studies, *Bioinorg. Chem. Appl.* 2015.

<sup>2</sup> Unpublished data.

**Table S2.** Hydrolysis constants of Zn<sup>2+</sup> at different temperatures and ionic strength values.

| Reaction                                                                                     | <i>t</i> / °C                                                                                                    | <i>I</i> / mol L <sup>-1</sup> | logβ <sup>1</sup>   |
|----------------------------------------------------------------------------------------------|------------------------------------------------------------------------------------------------------------------|--------------------------------|---------------------|
| Zn <sup>2+</sup> + H <sub>2</sub> O ⇌ [ZnOH] <sup>+</sup> + H <sup>+</sup>                   | 15                                                                                                               | 0.15                           | -9.5                |
|                                                                                              | 25                                                                                                               | 0.15                           | -9.14               |
|                                                                                              | 25                                                                                                               | 0.5                            | -9.15               |
|                                                                                              | 25                                                                                                               | 1                              | -9.16               |
|                                                                                              | 37                                                                                                               | 0.15                           | -8.78               |
|                                                                                              | 45                                                                                                               | 0.15                           | -10.02 <sup>2</sup> |
|                                                                                              | Zn <sup>2+</sup> + 2H <sub>2</sub> O ⇌ [Zn(OH) <sub>2</sub> ] <sup>0</sup> + 2H <sup>+</sup>                     | 15                             | 0.15                |
| 25                                                                                           |                                                                                                                  | 0.15                           | -17.10              |
| 25                                                                                           |                                                                                                                  | 0.5                            | -17.1               |
| 25                                                                                           |                                                                                                                  | 1                              | -17.22              |
| 37                                                                                           |                                                                                                                  | 0.15                           | -16.52              |
| 45                                                                                           |                                                                                                                  | 0.15                           | -16.52 <sup>2</sup> |
| Zn <sup>2+</sup> + 3H <sub>2</sub> O ⇌ [Zn(OH) <sub>3</sub> ] <sup>-</sup> + 3H <sup>+</sup> |                                                                                                                  | 15                             | 0.15                |
|                                                                                              | 25                                                                                                               | 0.15                           | -28.4               |
|                                                                                              | 25                                                                                                               | 0.5                            | -28.4               |
|                                                                                              | 25                                                                                                               | 1                              | -28.47              |
|                                                                                              | 37                                                                                                               | 0.15                           | -27.54              |
|                                                                                              | 45                                                                                                               | 0.15                           | -27.54 <sup>2</sup> |
|                                                                                              | Zn <sup>2+</sup> + 4H <sub>2</sub> O ⇌ [Zn(OH) <sub>4</sub> ] <sup>2-</sup> + 4H <sup>+</sup>                    | 15                             | 0.15                |
| 25                                                                                           |                                                                                                                  | 0.15                           | -40.40              |
| 25                                                                                           |                                                                                                                  | 0.5                            | -40.85              |
| 25                                                                                           |                                                                                                                  | 1                              | -40.38              |
| 37                                                                                           |                                                                                                                  | 0.15                           | -39.47              |
| 45                                                                                           |                                                                                                                  | 0.15                           | -39.47 <sup>2</sup> |
| 2Zn <sup>2+</sup> + H <sub>2</sub> O ⇌ [Zn <sub>2</sub> (OH)] <sup>3+</sup> + H <sup>+</sup> |                                                                                                                  | 15                             | 0.15                |
|                                                                                              | 25                                                                                                               | 0.15                           | -8.70               |
|                                                                                              | 25                                                                                                               | 0.5                            | -8.89               |
|                                                                                              | 25                                                                                                               | 1                              | -8.89               |
|                                                                                              | 37                                                                                                               | 0.15                           | -8.54               |
|                                                                                              | 45                                                                                                               | 0.15                           | -8.54 <sup>2</sup>  |
|                                                                                              | 2Zn <sup>2+</sup> + 6 H <sub>2</sub> O ⇌ [Zn <sub>2</sub> (OH) <sub>6</sub> ] <sup>2-</sup> +<br>6H <sup>+</sup> | 15                             | 0.15                |
| 25                                                                                           |                                                                                                                  | 0.15                           | -57.50              |
| 25                                                                                           |                                                                                                                  | 0.5                            | -57.53              |
| 25                                                                                           |                                                                                                                  | 1                              | -57.32              |
| 37                                                                                           |                                                                                                                  | 0.15                           | -55.9               |
| 45                                                                                           |                                                                                                                  | 0.15                           | -55.9 <sup>2</sup>  |

<sup>1</sup> F. Crea, G. Falcone, C. Foti, O. Giuffrè, S. Materazzi. Thermodynamic data for Pb<sup>2+</sup> and Zn<sup>2+</sup> sequestration by biologically important S-donor ligands, at different temperatures and ionic strengths, *New J. Chem.*, 2014, 38, 3973.

<sup>2</sup> K. J. Powell, P. L. Brown, R. H. Byrne, T. Gajda, G. Hefter, A. Leuz, S. Sjöberg, H. Wanner, Chemical speciation of environmentally significant metals with inorganic ligands. Part 5: The Zn<sup>2+</sup> + OH<sup>-</sup>, Cl<sup>-</sup>, CO<sub>3</sub><sup>2-</sup>, SO<sub>4</sub><sup>2-</sup>, and PO<sub>4</sub><sup>3-</sup> systems (IUPAC Technical Report), *Pure Appl. Chem.*, 2013, 85, 2249–2311.

**Table S3.** Hydrolysis constants of Mn<sup>2+</sup> at different temperatures and ionic strength values.

| Reaction                                                                                                    | <i>t</i><br>/°C | <i>I</i> / mol L <sup>-1</sup> | logβ <sup>1</sup>   |
|-------------------------------------------------------------------------------------------------------------|-----------------|--------------------------------|---------------------|
| Mn <sup>2+</sup> + H <sub>2</sub> O ⇌ [MnOH] <sup>+</sup> + H <sup>+</sup>                                  | 15              | 0.15                           | -10.6               |
|                                                                                                             | 25              | 0.15                           | -10.46              |
|                                                                                                             | 25              | 0.5                            | -10.70              |
|                                                                                                             | 25              | 1                              | -10.95              |
|                                                                                                             | 37              | 0.15                           | -9.20               |
|                                                                                                             | 45              | 0.1                            | -9.66 <sup>2</sup>  |
| 2Mn <sup>2+</sup> + 3H <sub>2</sub> O ⇌ [Mn <sub>2</sub> (OH) <sub>3</sub> ] <sup>-</sup> + 3H <sup>+</sup> | 15              | 0.15                           | -26.35              |
|                                                                                                             | 25              | 0.15                           | -24.47              |
|                                                                                                             | 25              | 0.5                            | -24.69              |
|                                                                                                             | 25              | 1                              | -24.92              |
|                                                                                                             | 37              | 0.15                           | -23.51              |
|                                                                                                             | 45              | 0.15                           | -24.84 <sup>2</sup> |

<sup>1</sup> C. Foti, O. Giuffrè. Interaction of Ampicillin and Amoxicillin with Mn<sup>2+</sup>: A Speciation Study in Aqueous Solution. *Molecules*, 2020, 25, 3110.

<sup>2</sup> Unpublished data.

**Table S4.** Cartesian components of the atomic species composing the gemcitabine molecular structures shown in Fig. 7 of the main text optimized at the at the B3LYP/6-311++G(d,p) level of theory under CPCM water implicit solvation.

**GMT**

|   | <b>X</b>  | <b>Y</b>  | <b>Z</b>  |
|---|-----------|-----------|-----------|
| N | -1.135780 | -0.149828 | 0.483570  |
| C | -2.040774 | -0.203497 | 1.509387  |
| C | -3.371839 | -0.229248 | 1.275122  |
| C | -3.785999 | -0.205182 | -0.097117 |
| N | -2.918044 | -0.164466 | -1.103343 |
| H | -1.630814 | -0.223674 | 2.510701  |
| H | -4.081883 | -0.271130 | 2.088047  |
| O | -0.736501 | -0.100685 | -1.763530 |
| C | -1.582652 | -0.137207 | -0.869090 |
| N | -5.096252 | -0.227095 | -0.400066 |
| H | -5.802926 | -0.255189 | 0.316358  |
| H | -5.384191 | -0.211832 | -1.366152 |
| C | 1.940284  | -0.955954 | -0.734941 |
| C | 1.954479  | 0.586184  | -0.878996 |
| C | 1.101855  | 1.072022  | 0.310024  |
| C | 0.293326  | -0.154015 | 0.804332  |
| H | 1.582037  | -1.397436 | -1.666622 |
| H | 0.347672  | -0.171846 | 1.893034  |
| O | 0.970346  | -1.277706 | 0.301313  |
| F | 0.307402  | 2.140486  | -0.005740 |
| F | 1.896779  | 1.497206  | 1.345396  |
| O | 3.264360  | 1.110392  | -0.902210 |
| H | 3.259642  | 1.929936  | -1.408394 |
| C | 3.256966  | -1.625569 | -0.358123 |
| H | 4.030807  | -1.314861 | -1.060127 |
| H | 3.124573  | -2.709827 | -0.450350 |
| O | 3.716015  | -1.290171 | 0.947452  |
| H | 3.054362  | -1.601631 | 1.576419  |
| H | 1.405997  | 0.858143  | -1.778739 |

**GMT+MnOH@site1**

|   | <b>X</b> | <b>Y</b>  | <b>Z</b>  |
|---|----------|-----------|-----------|
| N | 2.199392 | -0.011148 | 0.524085  |
| C | 3.093037 | -0.179605 | 1.549463  |
| C | 4.425221 | -0.186029 | 1.324765  |
| C | 4.854228 | -0.002821 | -0.031621 |
| N | 3.996725 | 0.169055  | -1.034208 |
| H | 2.672578 | -0.306819 | 2.538252  |
| H | 5.127223 | -0.320610 | 2.134532  |

|    |           |           |           |
|----|-----------|-----------|-----------|
| O  | 1.820411  | 0.339686  | -1.695271 |
| C  | 2.662544  | 0.178130  | -0.808936 |
| N  | 6.165826  | 0.000113  | -0.322991 |
| H  | 6.865893  | -0.122005 | 0.390258  |
| H  | 6.463284  | 0.133518  | -1.277193 |
| C  | -0.642433 | 1.311646  | -0.596645 |
| C  | -0.909341 | -0.162174 | -0.988625 |
| C  | -0.119178 | -0.978449 | 0.064735  |
| C  | 0.772007  | 0.032888  | 0.831762  |
| H  | -0.070813 | 1.786960  | -1.393879 |
| H  | 0.689044  | -0.187045 | 1.895213  |
| O  | 0.173017  | 1.285642  | 0.601353  |
| F  | 0.578283  | -2.012381 | -0.479039 |
| F  | -0.980507 | -1.542942 | 0.972007  |
| O  | -2.304591 | -0.476425 | -1.004139 |
| H  | -2.479123 | -1.248953 | -1.557645 |
| C  | -1.850012 | 2.180306  | -0.306091 |
| H  | -2.486138 | 2.255957  | -1.186328 |
| H  | -1.516138 | 3.180862  | -0.028432 |
| O  | -2.679777 | 1.657482  | 0.756992  |
| H  | -2.231760 | 1.745287  | 1.608405  |
| H  | -0.485848 | -0.369869 | -1.966879 |
| Mn | -3.961057 | 0.033511  | 0.318252  |
| O  | -5.058273 | -1.305149 | -0.419477 |
| H  | -5.758089 | -1.666532 | 0.133971  |

### GMT+MnOH@site2

|   | <b>X</b>  | <b>Y</b>  | <b>Z</b>  |
|---|-----------|-----------|-----------|
| N | -0.260203 | -0.318647 | 0.532309  |
| C | 0.559206  | -0.696567 | 1.551577  |
| C | 1.884891  | -0.917024 | 1.346856  |
| C | 2.345799  | -0.724745 | 0.021101  |
| N | 1.587210  | -0.348703 | -0.976085 |
| H | 0.099622  | -0.809572 | 2.524408  |
| H | 2.536300  | -1.211803 | 2.155791  |
| O | -0.513046 | 0.203992  | -1.680094 |
| C | 0.248214  | -0.129909 | -0.781632 |
| N | 3.721626  | -0.906259 | -0.269847 |
| H | 4.116735  | -1.707402 | 0.220402  |
| H | 3.855562  | -1.024888 | -1.272451 |
| C | -3.068986 | 1.278023  | -0.564938 |
| C | -3.351271 | -0.177831 | -1.011562 |
| C | -2.666936 | -1.035743 | 0.072324  |
| C | -1.689252 | -0.093853 | 0.821147  |

|    |           |           |           |
|----|-----------|-----------|-----------|
| H  | -2.591649 | 1.817562  | -1.384452 |
| H  | -1.798911 | -0.271407 | 1.891160  |
| O  | -2.104404 | 1.207708  | 0.525666  |
| F  | -2.044167 | -2.140166 | -0.442781 |
| F  | -3.576159 | -1.510314 | 0.979926  |
| O  | -4.729312 | -0.432930 | -1.162065 |
| H  | -4.846459 | -1.131632 | -1.815013 |
| C  | -4.261487 | 2.093716  | -0.079030 |
| H  | -5.039895 | 2.073323  | -0.841872 |
| H  | -3.933597 | 3.131492  | 0.049212  |
| O  | -4.840831 | 1.601288  | 1.124620  |
| H  | -4.184614 | 1.694348  | 1.825093  |
| H  | -2.811714 | -0.370236 | -1.937718 |
| Mn | 5.105583  | 0.756972  | 0.307625  |
| O  | 6.598384  | 0.602033  | -0.826014 |
| H  | 6.914154  | -0.277628 | -1.056073 |

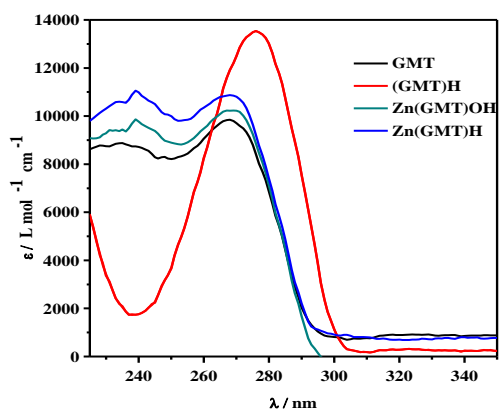

(a)

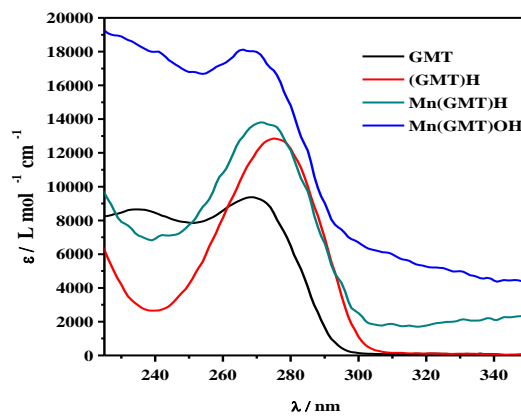

(b)

**Figure S1.**  $\epsilon$  vs.  $\lambda$  of **a)** and  $\text{Zn}^{2+}$ -GMT **b)**  $\text{Mn}^{2+}$ -GMT species at  $t = 45^\circ\text{C}$ ,  $I = 0.1 \text{ mol L}^{-1}$ .

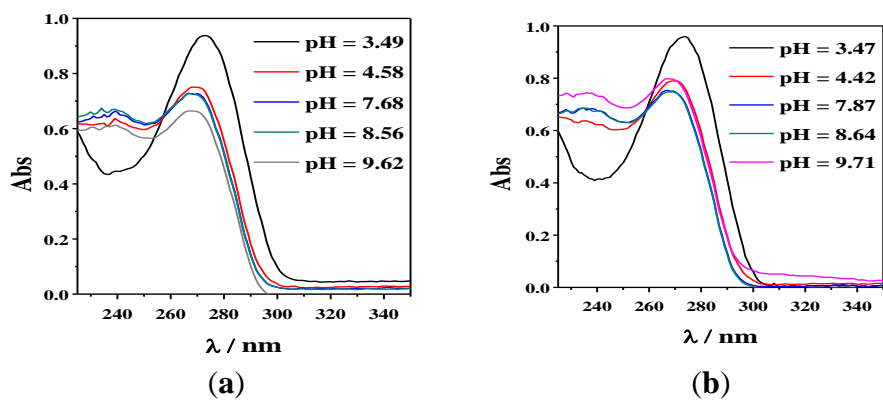

**Figure S2.** UV spectra at selected pH of a)  $\text{Mn}^{2+}$ -GMT and b)  $\text{Zn}^{2+}$ -GMT at  $t = 45^\circ\text{C}$ ,  $I = 0.1 \text{ mol L}^{-1}$ ,  $C_{\text{GMT}} = 0.04 \text{ mmol L}^{-1}$ ,  $C_{\text{M}} = 0.04 \text{ mmol L}^{-1}$ .



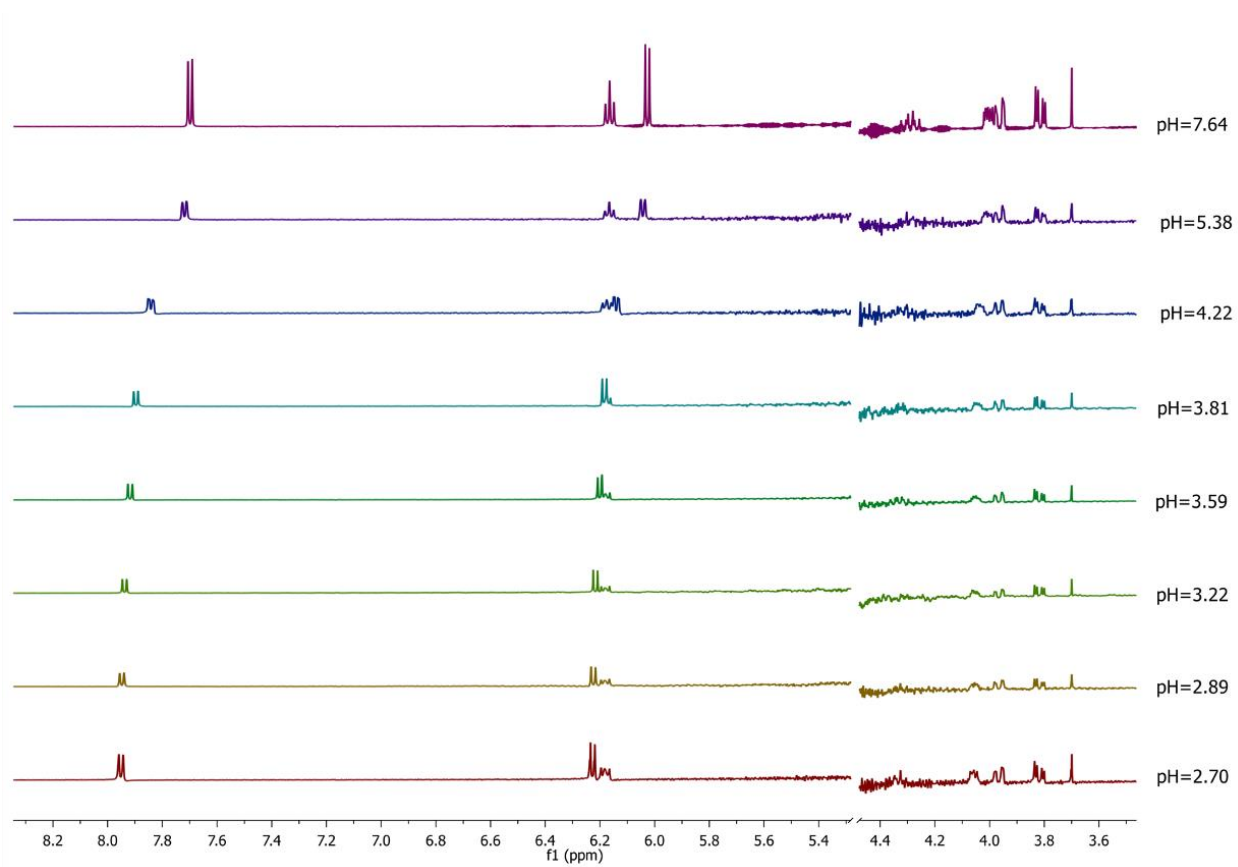

**Figure S3.**  $^1\text{H}$  NMR spectra on solutions containing  $\text{Zn}^{2+}$ -GMT at  $C_{\text{GMT}} = 5 \text{ mmol L}^{-1}$  and  $C_{\text{Zn}} = 6 \text{ mmol L}^{-1}$ ,  $t = 25^\circ\text{C}$ ,  $I = 0.1 \text{ mol L}^{-1}$  in NaCl,  $2.70 \leq \text{pH} \leq 7.64$ .

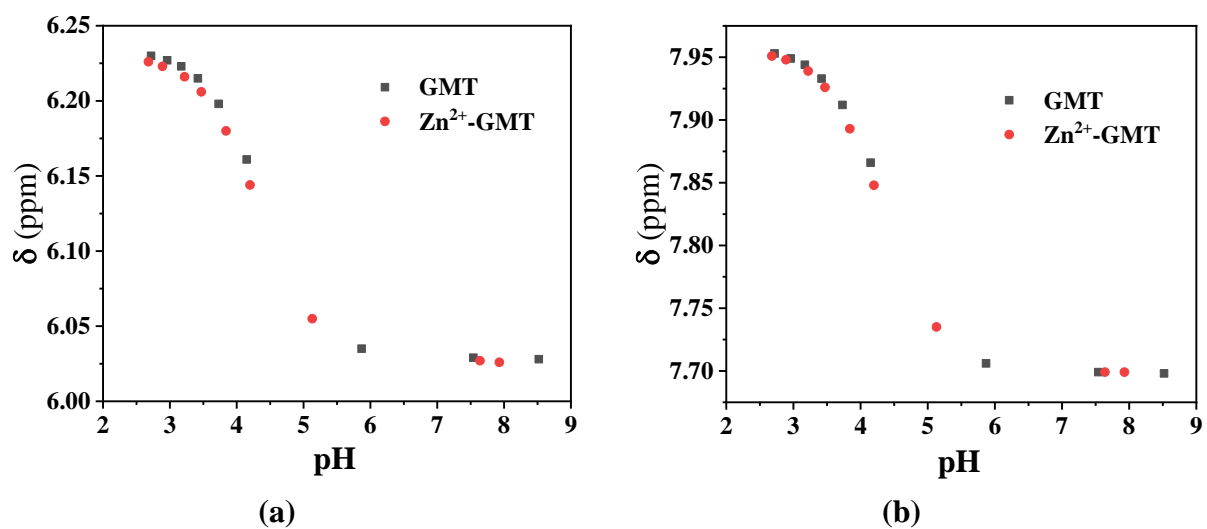

**Figure S4.** Comparison between chemical shift ( $\delta$ ) of a) CH-5' and b) CH-6' measured on <sup>1</sup>H NMR spectra on solutions containing GMT and Zn<sup>2+</sup>-GMT at  $C_{\text{GMT}} = 5 \text{ mmol L}^{-1}$  and  $C_{\text{Zn}} = 6 \text{ mmol L}^{-1}$ ,  $t = 25^\circ\text{C}$ ,  $I = 0.1 \text{ mol L}^{-1}$  in NaCl,  $2.72 \leq \text{pH} \leq 8.52$ .
